# Supplementary material for: Selective aerobic oxidative C–C bond cleavage using a high-entropy oxide-derived multimetallic catalyst
Source: Royal Society of Chemistry journal article supplement (doi:10.1039/d3re00525a), 2024-01-01
Supplement: d3re00525a1.pdf [file d3re00525a1.pdf]

# The selective aerobic oxidative C-C bond cleavage with the high-entropy oxide (HEO)-derived multimetallic catalyst

Shaoyuan Guo <sup>1</sup>, Xinli Tong<sup>1,\*</sup>, Jipeng Wang <sup>1</sup>, and Hang Tang<sup>1</sup>

<sup>1</sup>Tianjin Key Laboratory of Organic Solar Cells and Photochemical Conversion, School of Chemistry and Chemical Engineering, Tianjin University of Technology, Tianjin 300384, P. R. China; Tel: (+86)-22-60214259; E-mail address: tongxinli@tju.edu.cn; tongxli@sohu.com.

## Supplementary Information

### 1. The characterization of catalysts

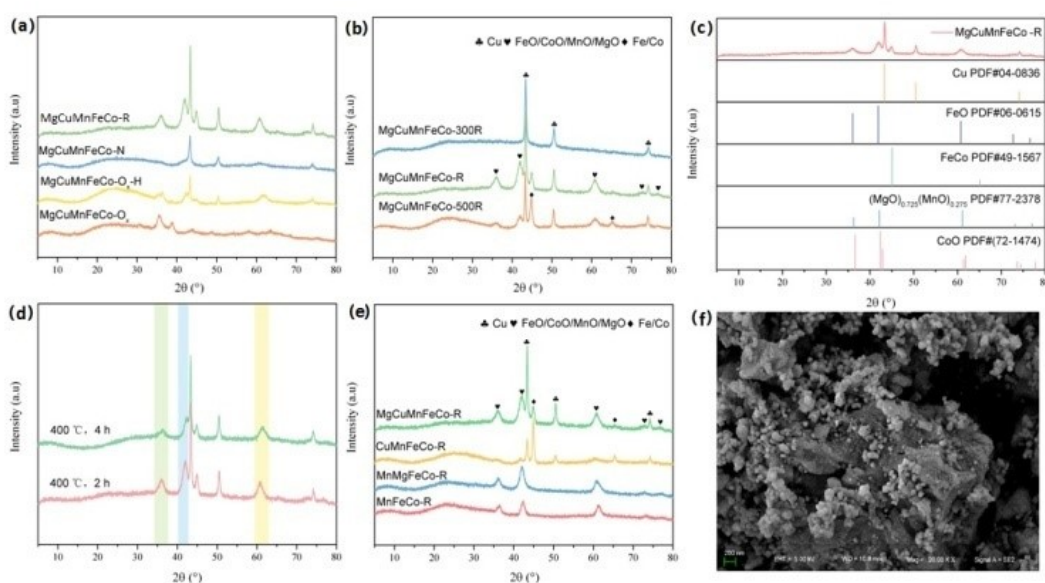

**Figure S1.** The XRD patterns and SEM images of the catalysts (a. XRD patterns of the catalysts with different treatments; b. XRD patterns of the catalysts with different calcination temperatures; c. PDF cards corresponding to the different elements of MgCuMnFeCo-R Catalyst; d. XRD patterns of the catalysts with different calcination times; e. XRD patterns of the catalysts with different elements; f. SEM images of the CuFeCoMnMg-R catalysts)

**Table S1.** The BET results of the catalysts

| Catalyst        | Surface Area (m <sup>2</sup> /g) | Pore Volume (cm <sup>3</sup> /g) | Pore Size (nm) |
|-----------------|----------------------------------|----------------------------------|----------------|
| MgCuMnFeCo-300R | 28                               | 0.05                             | 4.1            |
| MgCuMnFeCo-R    | 80                               | 0.09                             | 3.5            |
| MgCuMnFeCo-500R | 52                               | 0.11                             | 4.2            |

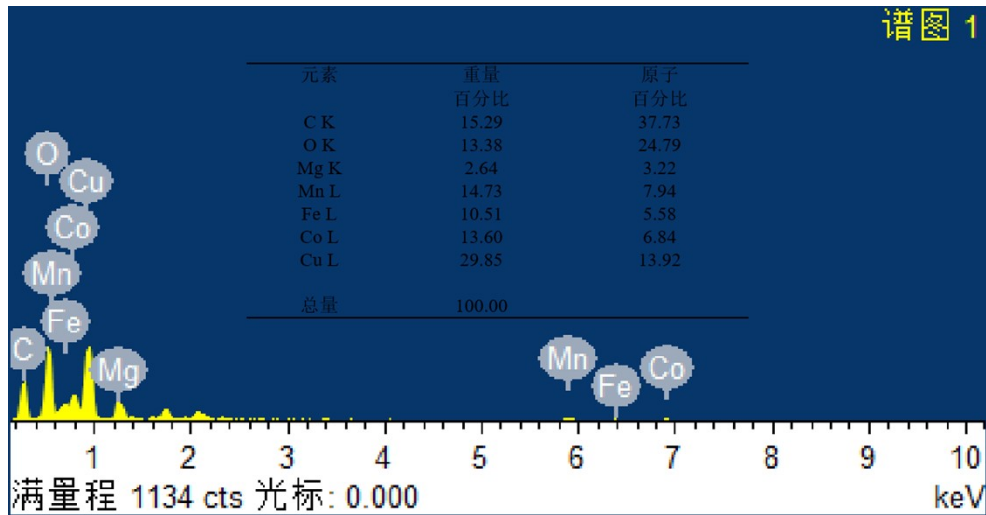

**Figure S2.** Energy dispersive X-ray spectroscopy (EDX) patterns of catalyst

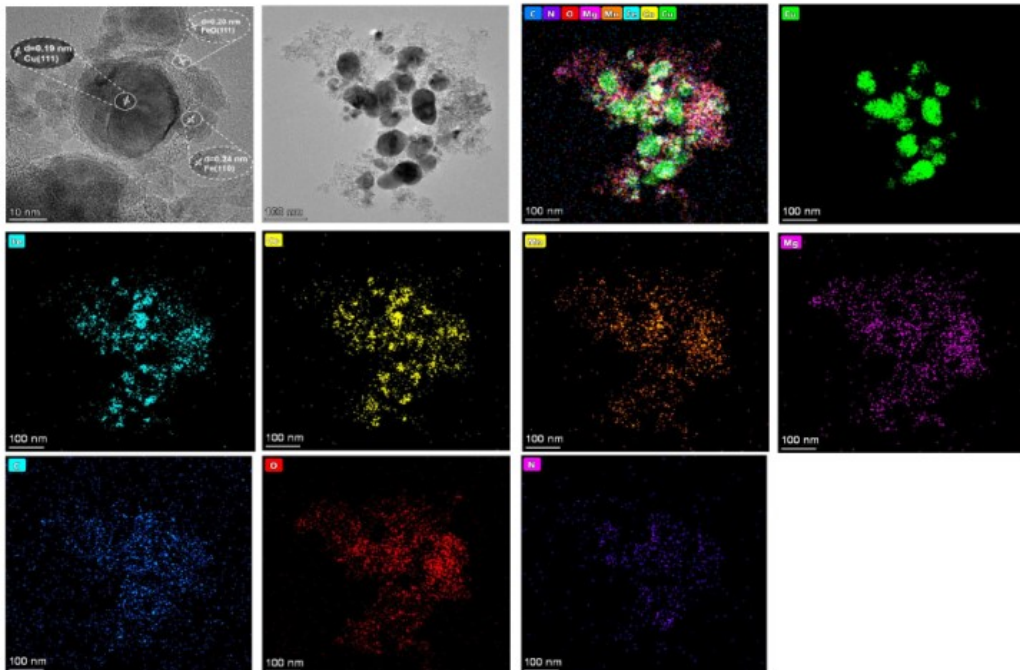

**Figure S3.** The TEM images and element mapping (Cu, Fe, Co, Mn, Mg, C, N, O) of the MgCuMnFeCo-R catalyst

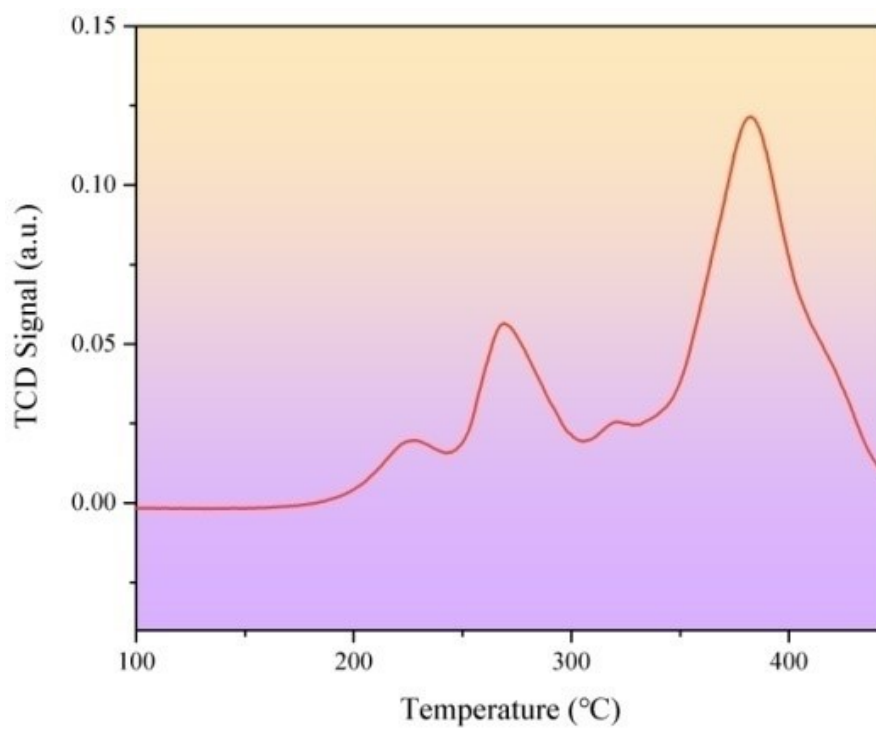

**Figure S4.** The result for H<sub>2</sub>-TPR experiment of MgCuMnFeCo-P catalyst

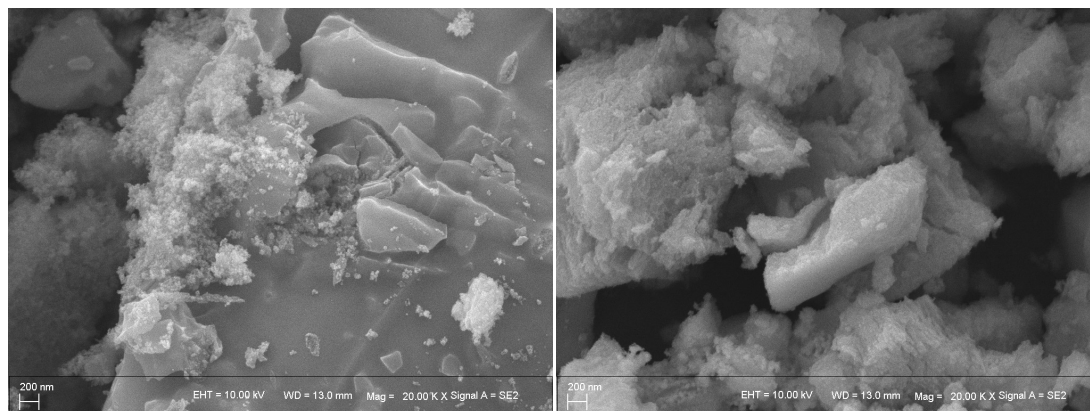

**Figure S5.** The SEM images of CuFeCoMnMg-O<sub>x</sub> (left) and CuFeCoMnMg-O<sub>x</sub>-R (right) catalyst

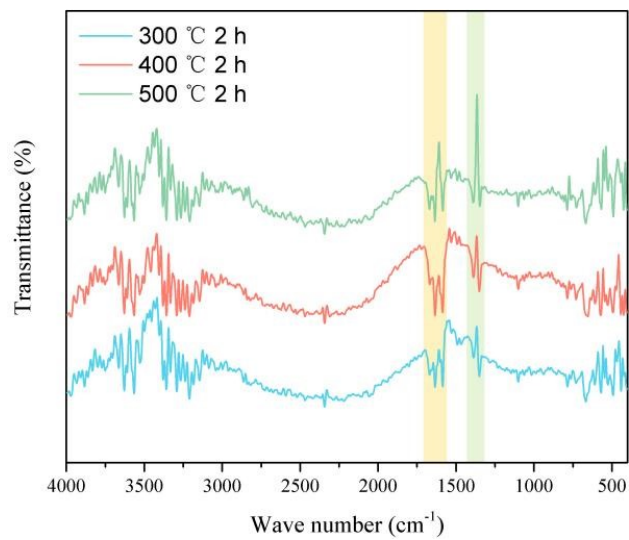

**Figure S6.** The IR spectra of catalysts calcined at different temperatures

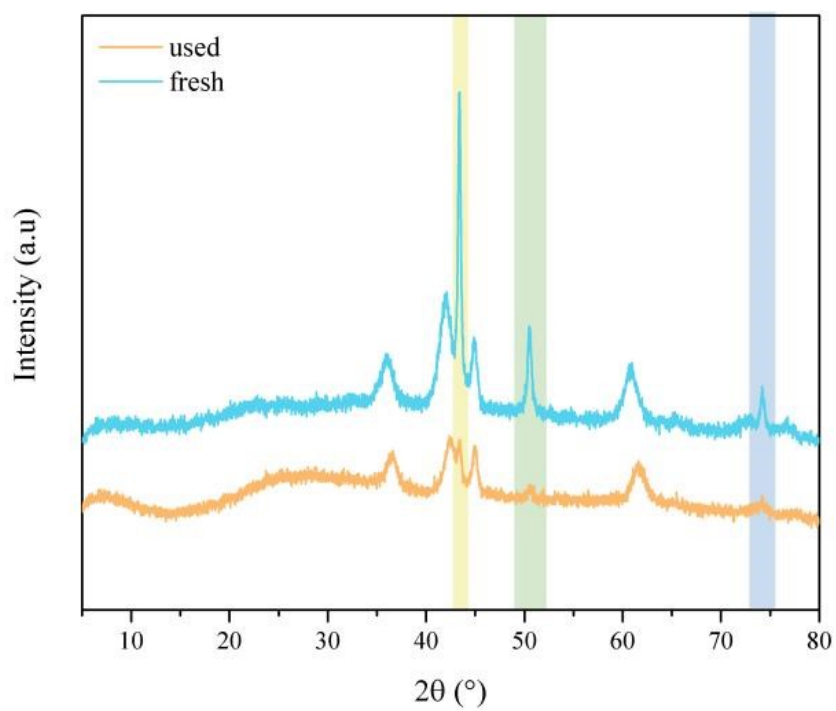

**Figure S7.** The XRD patterns of the fresh and reused catalysts

## 2. The effect of reaction solvent on the oxidative cleavage process

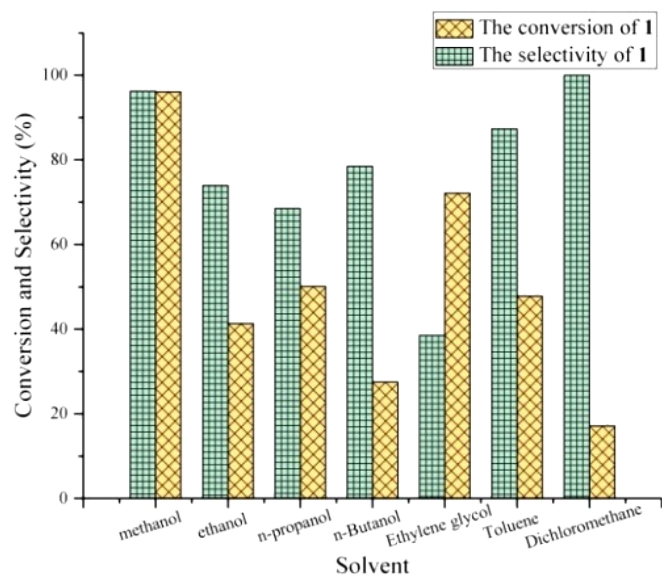

**Figure S8.** Effect of different solvents on oxidative cleavage process of **1** with molecular oxygen

### 3. The reaction mechanism of oxidation of **1** with $O_2$

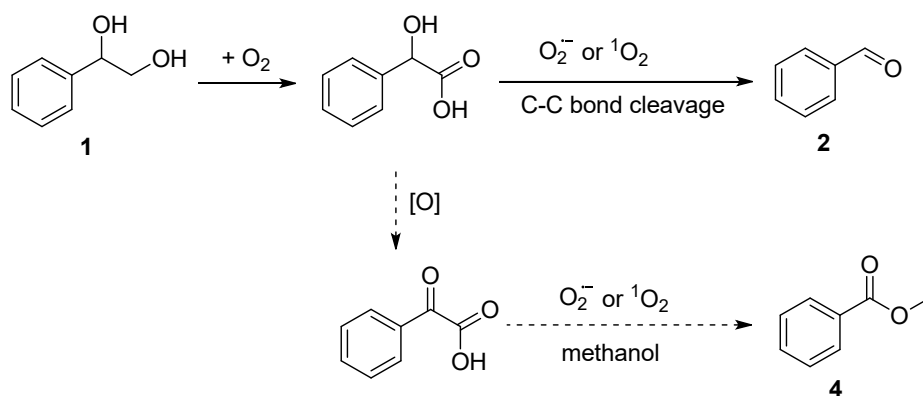

**Scheme S1.** The possible mechanism for the oxidative cleavage process of **1** with  $O_2$

### 4. The GC and GC-MS spectra for the selective oxidative cleavage processes

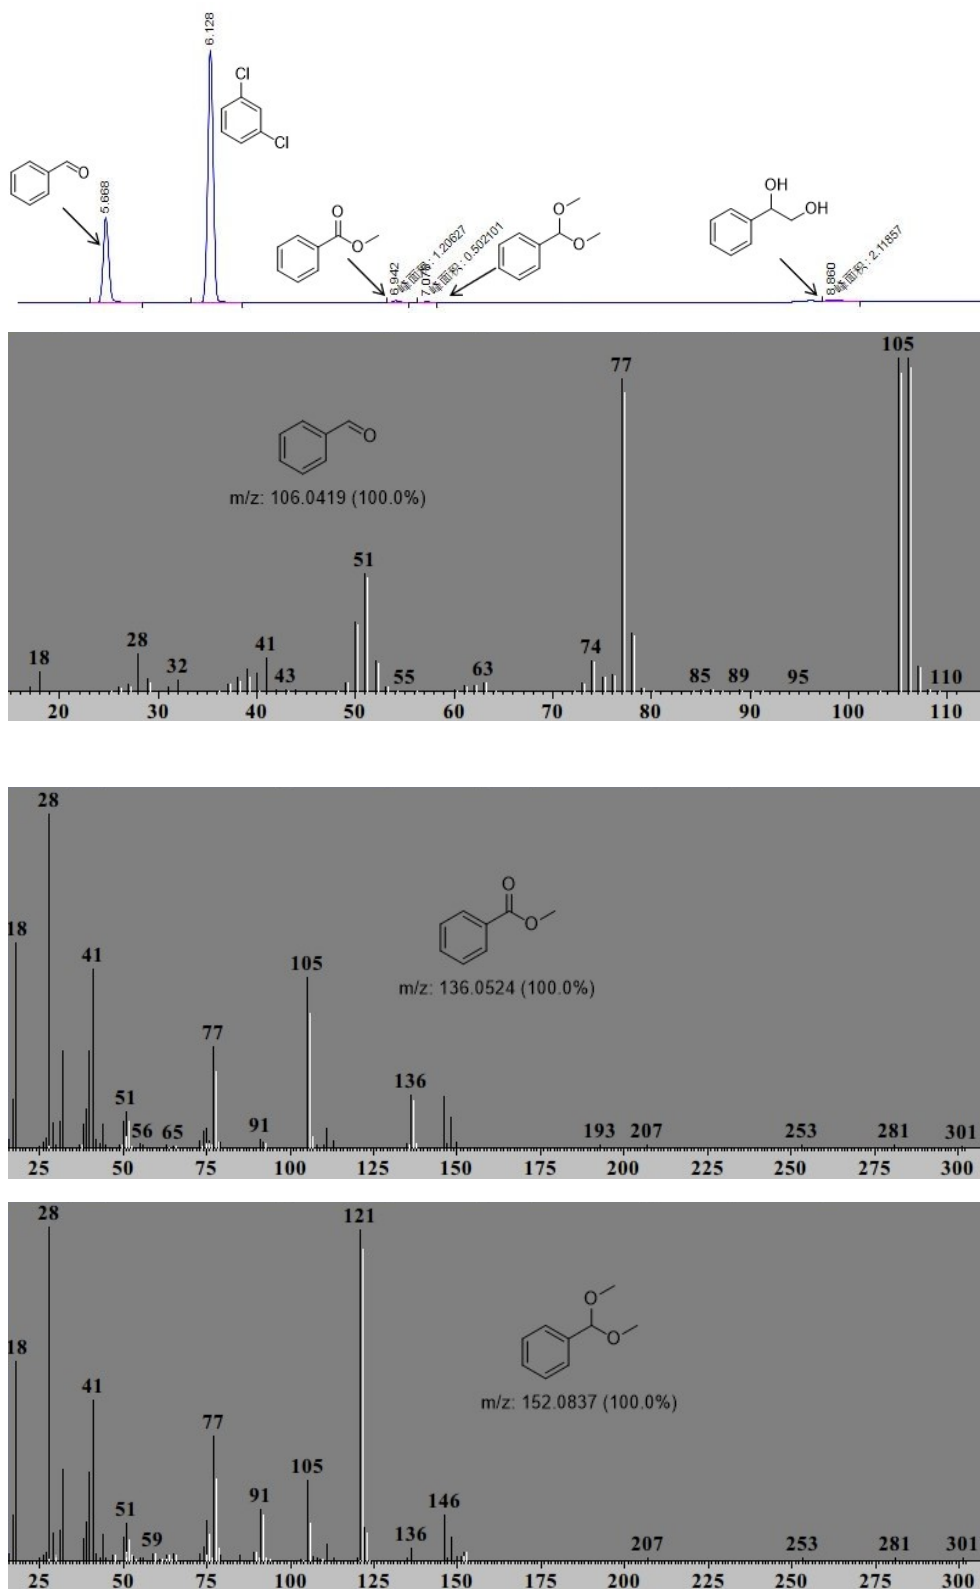

**Figure S9.** The GC and GC-MS spectra for reaction of 1-phenyl-1,2-ethanediol in the methanol

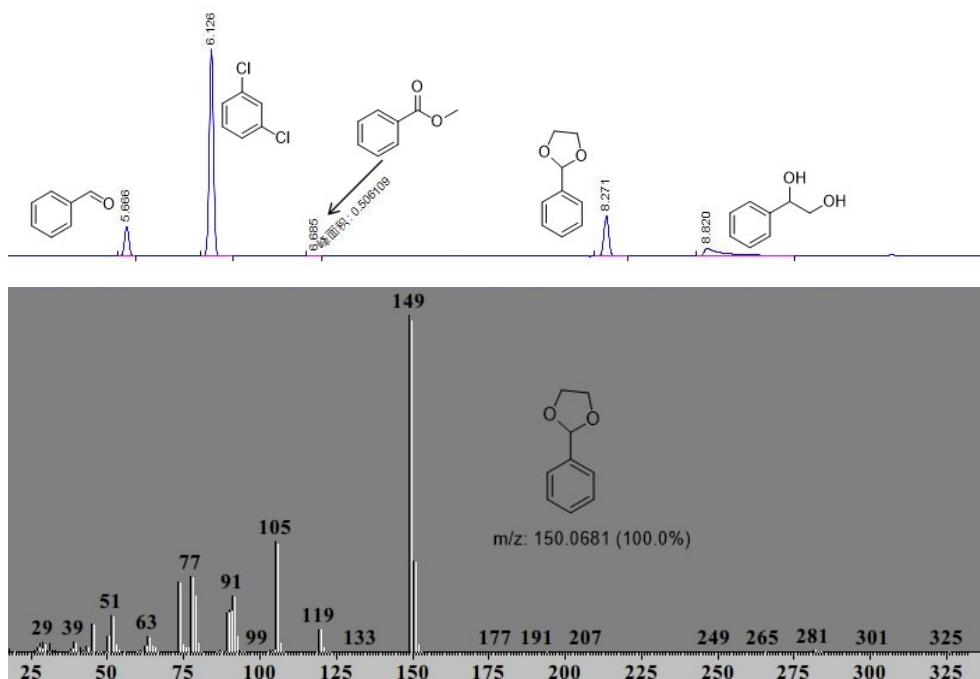

Figure S10. GC and GC-MS spectra of reaction of 1-phenyl-1,2-ethanediol in the ethylene glycol

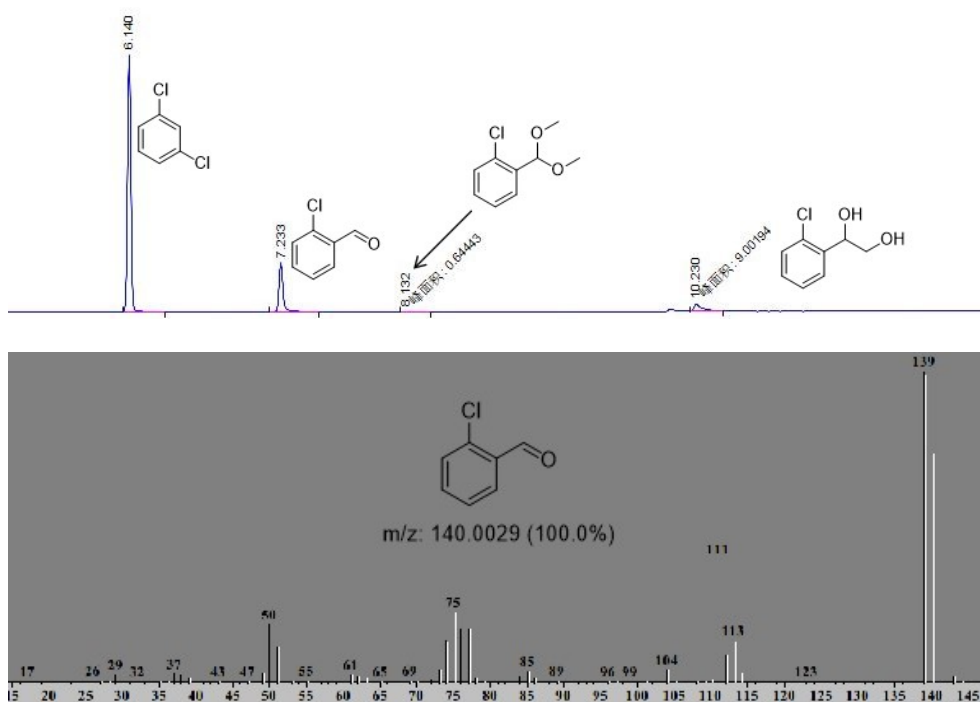

Figure S11. The GC and GC-MS spectra for the reaction of 1-(2-chlorophenyl) ethane-1,2-diol

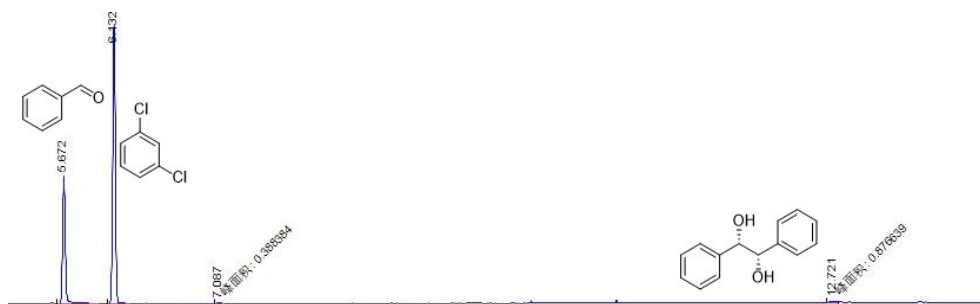

**Figure S12.** The GC and GC-MS spectra for the reaction of (S,S)-(-)-hydrobenzoin with O<sub>2</sub>

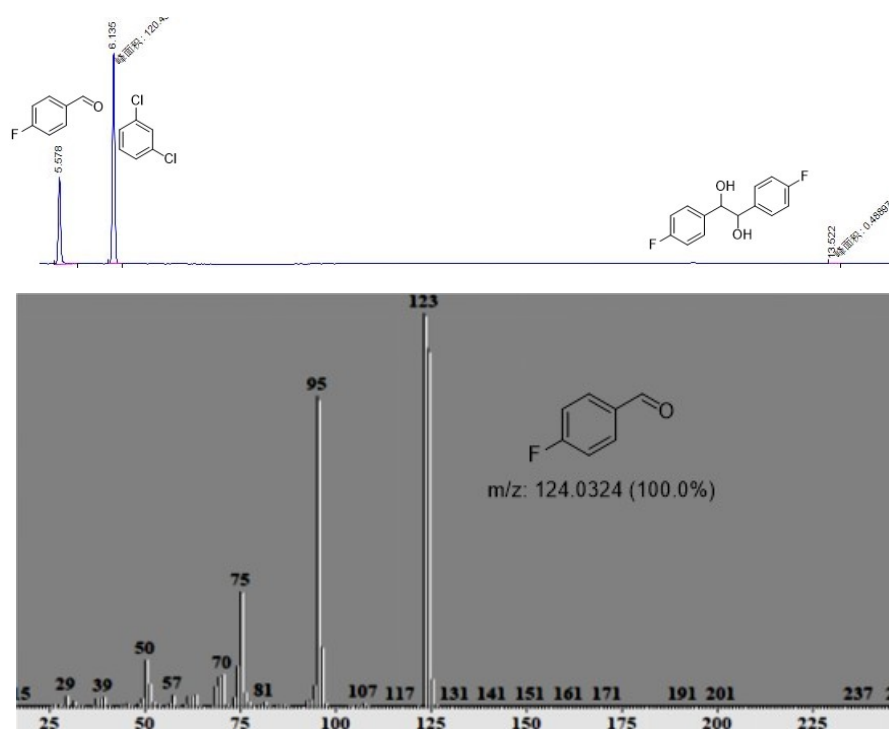

**Figure S13.** The GC and GC-MS spectra for reaction of 1,2-bis(4-fluorophenyl)ethane-1,2-diol



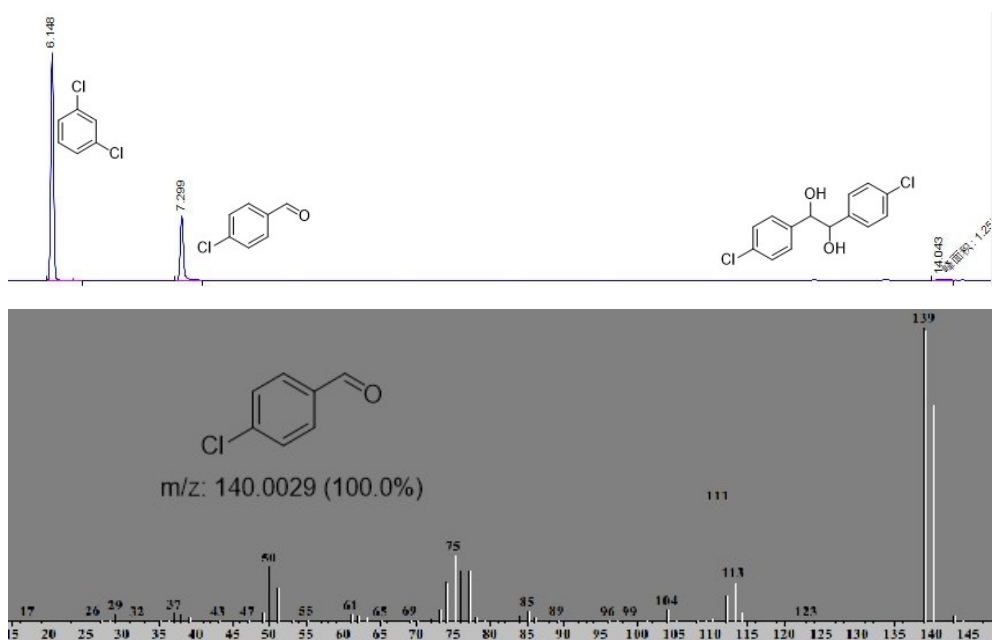

**Figure S14.** The GC and GC-MS spectra of reaction of 1,2-bis(4-chlorophenyl)ethane-1,2-diol

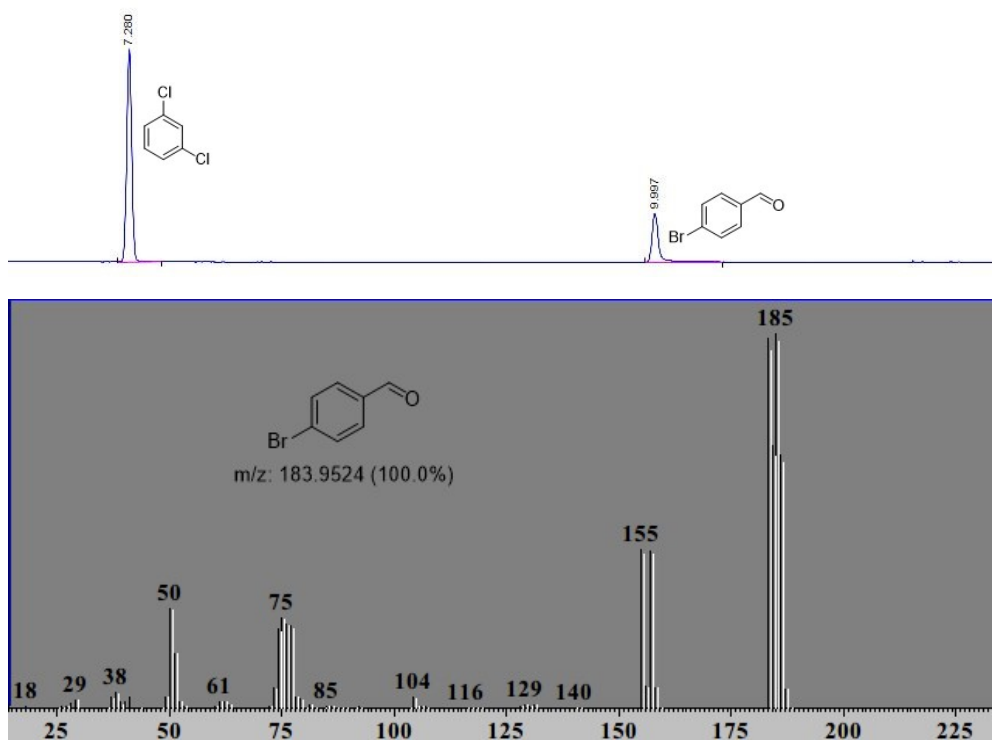

**Figure S15.** The GC and GC-MS spectra for reaction of 1,2-bis(4-bromophenyl)ethane-1,2-diol

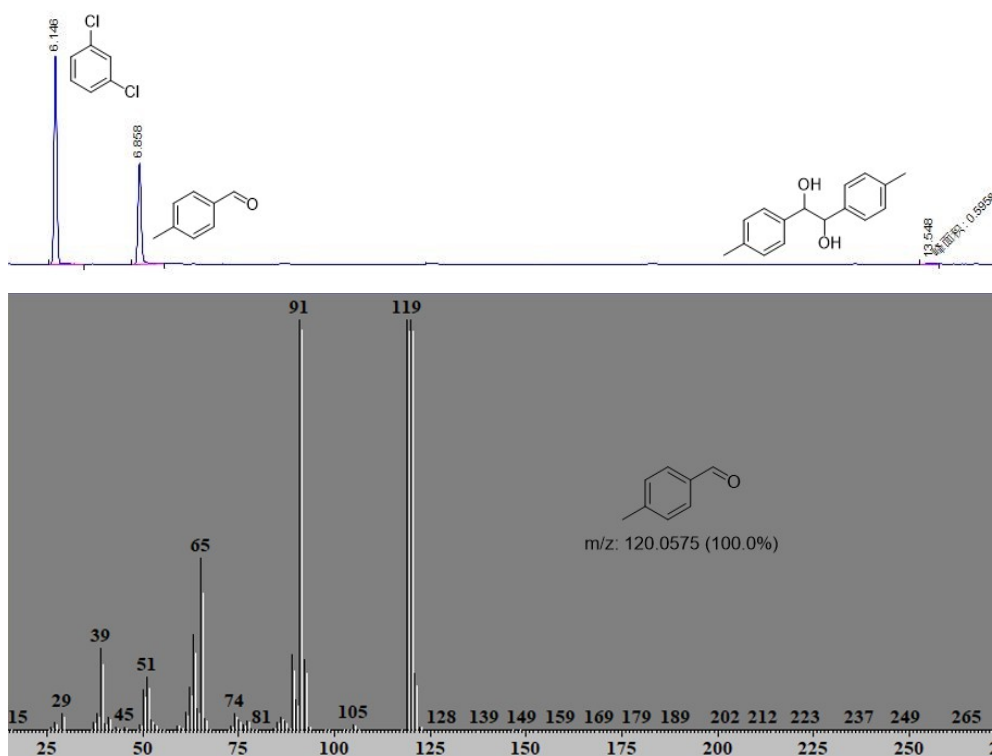

**Figure S16.** The GC and GC-MS spectra for reaction of 1,2-bis(4-bromophenyl)ethane-1,2-diol

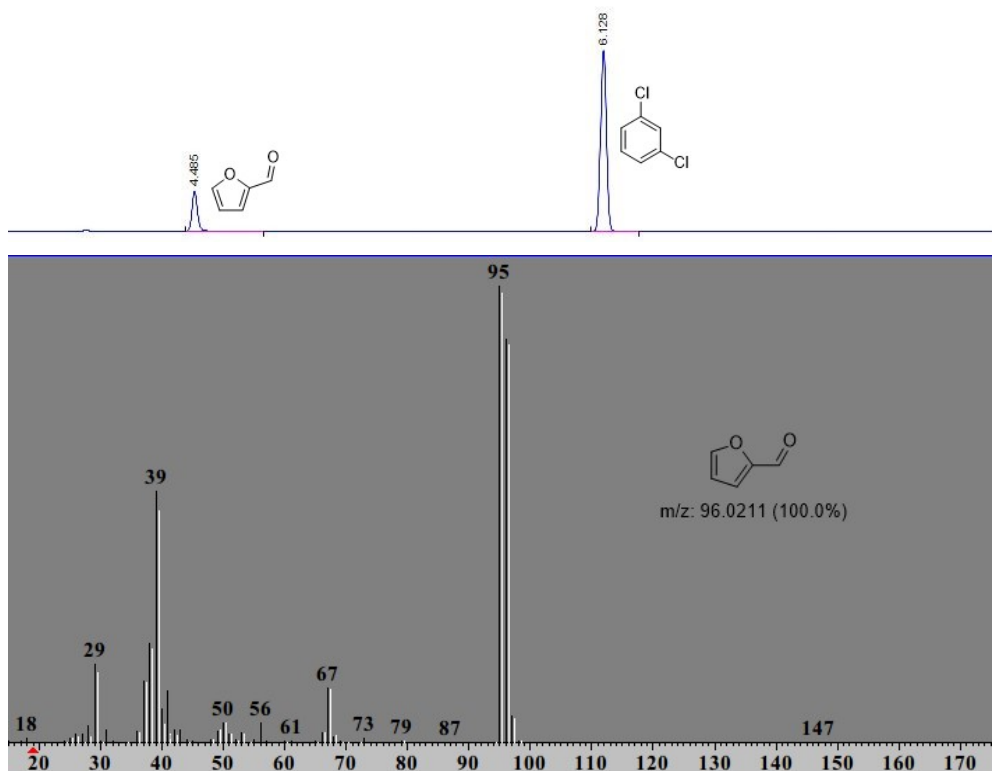

**Figure S17.** The GC and GC-MS spectra for the reaction of 1,2-bis(2-furanyl)ethane-1,2-diol

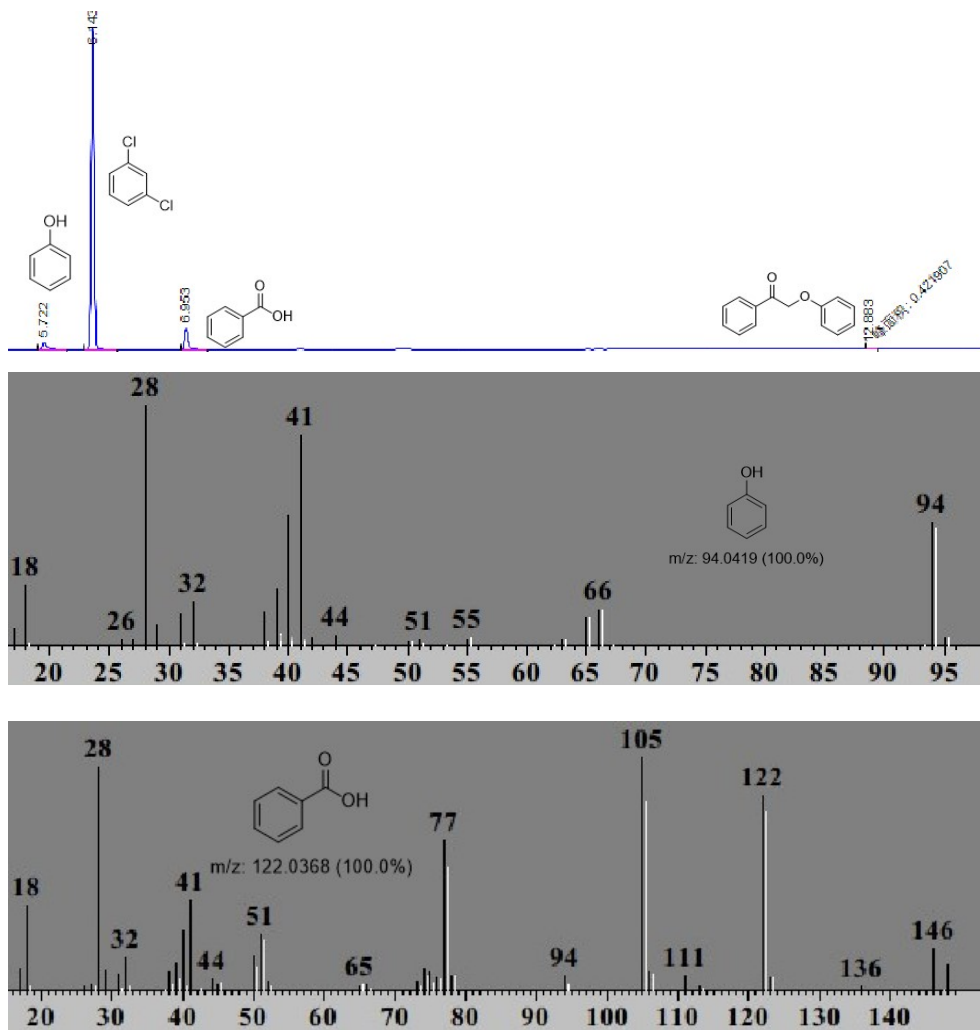

**Figure S18.** The GC and GC-MS spectra of reaction of 2-phenoxy-1-phenylacetophenone with O<sub>2</sub>
